# Supplementary material for: Assessment of Symptom, Disability, and Financial Trajectories in Patients Hospitalized for COVID-19 at 6 Months
Source: PubMed Central journal article supplement (PMC9929698; doi:10.1001/jamanetworkopen.2022.55795), 2023-02-14
Supplement: jamanetwopen-e2255795-s002.pdf [file jamanetwopen-e2255795-s002.pdf]

\*First name, last name, and suffix (if applicable) are required and will appear in PubMed.

| <b>*Group Name(s): The National Heart, Lung, and Blood Institute Prevention and Early Treatment of Acute Lung Injury (PETAL) Network</b> |                   |                              |                         |                    |                                                 |                                                                |                                                                                                   |
|------------------------------------------------------------------------------------------------------------------------------------------|-------------------|------------------------------|-------------------------|--------------------|-------------------------------------------------|----------------------------------------------------------------|---------------------------------------------------------------------------------------------------|
| <b>*First Name and Middle Initial(s)</b>                                                                                                 | <b>*Last Name</b> | <b>*Suffix (eg, Jr, III)</b> | <b>Academic Degrees</b> | <b>Institution</b> | <b>Location (city, state/province, country)</b> | <b>Role or Contribution, eg, chair, principal investigator</b> | <b>Group (if more than 1 Group listed in the byline) and/or Subgroup (eg, Steering Committee)</b> |
| Francois                                                                                                                                 | Abi Fadel         |                              |                         |                    |                                                 |                                                                |                                                                                                   |
| Michael                                                                                                                                  | Aboodi            |                              |                         |                    |                                                 |                                                                |                                                                                                   |
| Samuel                                                                                                                                   | Acquah            |                              |                         |                    |                                                 |                                                                |                                                                                                   |
| Jason Y                                                                                                                                  | Adams             |                              |                         |                    |                                                 |                                                                |                                                                                                   |
| Neil                                                                                                                                     | Aggarwal          |                              |                         |                    |                                                 |                                                                |                                                                                                   |
| Narendrakumar                                                                                                                            | Alappan           |                              |                         |                    |                                                 |                                                                |                                                                                                   |
| Timothy E                                                                                                                                | Albertson         |                              |                         |                    |                                                 |                                                                |                                                                                                   |
| Mohammed                                                                                                                                 | Al-Jaghbeer       |                              |                         |                    |                                                 |                                                                |                                                                                                   |
| Eyad                                                                                                                                     | Almasri           |                              |                         |                    |                                                 |                                                                |                                                                                                   |
| James S                                                                                                                                  | Andrews           |                              |                         |                    |                                                 |                                                                |                                                                                                   |
| Derek C                                                                                                                                  | Angus             |                              |                         |                    |                                                 |                                                                |                                                                                                   |
| Jason V                                                                                                                                  | Baker             |                              |                         |                    |                                                 |                                                                |                                                                                                   |
| Rebecca                                                                                                                                  | Baron             |                              |                         |                    |                                                 |                                                                |                                                                                                   |
| Michael                                                                                                                                  | Baumann           |                              |                         |                    |                                                 |                                                                |                                                                                                   |
| Torben                                                                                                                                   | Becker            |                              |                         |                    |                                                 |                                                                |                                                                                                   |
| Michelle                                                                                                                                 | Biehl             |                              |                         |                    |                                                 |                                                                |                                                                                                   |
| Billie A                                                                                                                                 | Bixby             |                              |                         |                    |                                                 |                                                                |                                                                                                   |
| Joseph R                                                                                                                                 | Bledsoe           |                              |                         |                    |                                                 |                                                                |                                                                                                   |
| John W                                                                                                                                   | Bloom             |                              |                         |                    |                                                 |                                                                |                                                                                                   |
| Somnath                                                                                                                                  | Bose              |                              |                         |                    |                                                 |                                                                |                                                                                                   |
| Katherine L                                                                                                                              | Boyle             |                              |                         |                    |                                                 |                                                                |                                                                                                   |
| Patrick                                                                                                                                  | Bradley           |                              |                         |                    |                                                 |                                                                |                                                                                                   |
| Rich D                                                                                                                                   | Branson           |                              |                         |                    |                                                 |                                                                |                                                                                                   |
| Samuel                                                                                                                                   | Brown             |                              |                         |                    |                                                 |                                                                |                                                                                                   |
| Ellen L                                                                                                                                  | Burnham           |                              |                         |                    |                                                 |                                                                |                                                                                                   |
| Carolyn                                                                                                                                  | Calfee            |                              |                         |                    |                                                 |                                                                |                                                                                                   |
| Sean J                                                                                                                                   | Callahan          |                              |                         |                    |                                                 |                                                                |                                                                                                   |
| Alessandro                                                                                                                               | Cancelliere       |                              |                         |                    |                                                 |                                                                |                                                                                                   |
| Shannon                                                                                                                                  | Carson            |                              |                         |                    |                                                 |                                                                |                                                                                                   |
| Jonathan D                                                                                                                               | Casey             |                              |                         |                    |                                                 |                                                                |                                                                                                   |
| Steven Y                                                                                                                                 | Chang             |                              |                         |                    |                                                 |                                                                |                                                                                                   |
| Sweta                                                                                                                                    | Chekuri           |                              |                         |                    |                                                 |                                                                |                                                                                                   |
| Peter                                                                                                                                    | Chen              |                              |                         |                    |                                                 |                                                                |                                                                                                   |
| Tina                                                                                                                                     | Chen              |                              |                         |                    |                                                 |                                                                |                                                                                                   |
| James                                                                                                                                    | Chenoweth         |                              |                         |                    |                                                 |                                                                |                                                                                                   |
| Philip                                                                                                                                   | Choi              |                              |                         |                    |                                                 |                                                                |                                                                                                   |
| Ivan                                                                                                                                     | Co                |                              |                         |                    |                                                 |                                                                |                                                                                                   |
| Sean                                                                                                                                     | Collins           |                              |                         |                    |                                                 |                                                                |                                                                                                   |
| Ana Carolina                                                                                                                             | Costa Monteiro    |                              |                         |                    |                                                 |                                                                |                                                                                                   |
| Mick                                                                                                                                     | Couper            |                              |                         |                    |                                                 |                                                                |                                                                                                   |
| Christopher                                                                                                                              | Cox               |                              |                         |                    |                                                 |                                                                |                                                                                                   |

\*First name, last name, and suffix (if applicable) are required and will appear in PubMed.

| *First Name and Middle Initial(s) | *Last Name   | *Suffix (eg, Jr, III) | Academic Degrees | Institution | Location (city, state/province, country) | Role or Contribution, eg, chair, principal investigator | Group (if more than 1 Group listed in the byline) and/or Subgroup (eg, Steering Committee) |
|-----------------------------------|--------------|-----------------------|------------------|-------------|------------------------------------------|---------------------------------------------------------|--------------------------------------------------------------------------------------------|
| Jonathan                          | Daich        |                       |                  |             |                                          |                                                         |                                                                                            |
| Marjolein                         | de Wit       |                       |                  |             |                                          |                                                         |                                                                                            |
| Ben P                             | deBoisblanc  |                       |                  |             |                                          |                                                         |                                                                                            |
| Matthew R                         | Dettmer      |                       |                  |             |                                          |                                                         |                                                                                            |
| Sanjay                            | Dhar         |                       |                  |             |                                          |                                                         |                                                                                            |
| David                             | Dillon       |                       |                  |             |                                          |                                                         |                                                                                            |
| Sarah                             | Doernberg    |                       |                  |             |                                          |                                                         |                                                                                            |
| Pratik B                          | Doshi        |                       |                  |             |                                          |                                                         |                                                                                            |
| Ivor S                            | Douglas      |                       |                  |             |                                          |                                                         |                                                                                            |
| Brian                             | Driver       |                       |                  |             |                                          |                                                         |                                                                                            |
| Siddharth P                       | Dugar        |                       |                  |             |                                          |                                                         |                                                                                            |
| Abhijit                           | Duggal       |                       |                  |             |                                          |                                                         |                                                                                            |
| Marie-Carmelle                    | Elie         |                       |                  |             |                                          |                                                         |                                                                                            |
| Kyle B                            | Enfield      |                       |                  |             |                                          |                                                         |                                                                                            |
| John                              | Eppensteiner |                       |                  |             |                                          |                                                         |                                                                                            |
| Daniel                            | Fein         |                       |                  |             |                                          |                                                         |                                                                                            |
| Michael                           | Filbin       |                       |                  |             |                                          |                                                         |                                                                                            |
| Clark                             | Files        |                       |                  |             |                                          |                                                         |                                                                                            |
| James H                           | Finigan      |                       |                  |             |                                          |                                                         |                                                                                            |
| Alexander H                       | Flannery     |                       |                  |             |                                          |                                                         |                                                                                            |
| Andrea                            | Foulkes      |                       |                  |             |                                          |                                                         |                                                                                            |
| Alpha A                           | Fowler       |                       |                  |             |                                          |                                                         |                                                                                            |
| Adam                              | Frisch       |                       |                  |             |                                          |                                                         |                                                                                            |
| Monica                            | Fung         |                       |                  |             |                                          |                                                         |                                                                                            |
| John                              | Gaillard     |                       |                  |             |                                          |                                                         |                                                                                            |
| James W                           | Galbraith    |                       |                  |             |                                          |                                                         |                                                                                            |
| Sheetal                           | Gandotra     |                       |                  |             |                                          |                                                         |                                                                                            |
| Jayna M                           | Gardner-Gray |                       |                  |             |                                          |                                                         |                                                                                            |
| Elizabeth A                       | Gay          |                       |                  |             |                                          |                                                         |                                                                                            |
| Kevin                             | Gibbs        |                       |                  |             |                                          |                                                         |                                                                                            |
| Evanpaul                          | Gill         |                       |                  |             |                                          |                                                         |                                                                                            |
| Adit                              | Ginde        |                       |                  |             |                                          |                                                         |                                                                                            |
| Timothy D                         | Girard       |                       |                  |             |                                          |                                                         |                                                                                            |
| Pauline H                         | Go           |                       |                  |             |                                          |                                                         |                                                                                            |
| Neha N                            | Goel         |                       |                  |             |                                          |                                                         |                                                                                            |
| Ewan C                            | Goligher     |                       |                  |             |                                          |                                                         |                                                                                            |
| Jose                              | Gomez-Arroyo |                       |                  |             |                                          |                                                         |                                                                                            |
| Michelle Ng                       | Gong         |                       |                  |             |                                          |                                                         |                                                                                            |
| Andrew J                          | Goodwin      |                       |                  |             |                                          |                                                         |                                                                                            |
| Richard D                         | Gordon       |                       |                  |             |                                          |                                                         |                                                                                            |
| Colin K                           | Grissom      |                       |                  |             |                                          |                                                         |                                                                                            |
| Kyle                              | Gunnerson    |                       |                  |             |                                          |                                                         |                                                                                            |
| Jin Ho                            | Han          |                       |                  |             |                                          |                                                         |                                                                                            |

\*First name, last name, and suffix (if applicable) are required and will appear in PubMed.

| *First Name and Middle Initial(s) | *Last Name  | *Suffix (eg, Jr, III) | Academic Degrees | Institution | Location (city, state/province, country) | Role or Contribution, eg, chair, principal investigator | Group (if more than 1 Group listed in the byline) and/or Subgroup (eg, Steering Committee) |
|-----------------------------------|-------------|-----------------------|------------------|-------------|------------------------------------------|---------------------------------------------------------|--------------------------------------------------------------------------------------------|
| Tarik                             | Hanane      |                       |                  |             |                                          |                                                         |                                                                                            |
| Christopher K                     | Hansen      |                       |                  |             |                                          |                                                         |                                                                                            |
| Kyle                              | Happel      |                       |                  |             |                                          |                                                         |                                                                                            |
| Estelle S                         | Harris      |                       |                  |             |                                          |                                                         |                                                                                            |
| Jason                             | Haukoos     |                       |                  |             |                                          |                                                         |                                                                                            |
| Gregory W                         | Hendey      |                       |                  |             |                                          |                                                         |                                                                                            |
| Carolyn M                         | Hendrickson |                       |                  |             |                                          |                                                         |                                                                                            |
| Kathryn A                         | Hibbert     |                       |                  |             |                                          |                                                         |                                                                                            |
| Ellie                             | Hirshberg   |                       |                  |             |                                          |                                                         |                                                                                            |
| R. Duncan                         | Hite        |                       |                  |             |                                          |                                                         |                                                                                            |
| Aluko A                           | Hope        |                       |                  |             |                                          |                                                         |                                                                                            |
| Jason                             | Hoth        |                       |                  |             |                                          |                                                         |                                                                                            |
| Peter C                           | Hou         |                       |                  |             |                                          |                                                         |                                                                                            |
| Terri                             | Hough       |                       |                  |             |                                          |                                                         |                                                                                            |
| Judie A                           | Howrylak    |                       |                  |             |                                          |                                                         |                                                                                            |
| David T                           | Huang       |                       |                  |             |                                          |                                                         |                                                                                            |
| Kristin                           | Hudock      |                       |                  |             |                                          |                                                         |                                                                                            |
| Ryan                              | Huebinger   |                       |                  |             |                                          |                                                         |                                                                                            |
| Gina                              | Hurst       |                       |                  |             |                                          |                                                         |                                                                                            |
| Cameron D                         | Hypes       |                       |                  |             |                                          |                                                         |                                                                                            |
| Robert C                          | Hyzy        |                       |                  |             |                                          |                                                         |                                                                                            |
| Nicole                            | Iovine      |                       |                  |             |                                          |                                                         |                                                                                            |
| Marjan                            | Islam       |                       |                  |             |                                          |                                                         |                                                                                            |
| Jennifer                          | Israel      |                       |                  |             |                                          |                                                         |                                                                                            |
| Jack                              | Iwashyna    |                       |                  |             |                                          |                                                         |                                                                                            |
| Faraz                             | Jaffer      |                       |                  |             |                                          |                                                         |                                                                                            |
| William                           | Janssen     |                       |                  |             |                                          |                                                         |                                                                                            |
| Namita                            | Jayaprakash |                       |                  |             |                                          |                                                         |                                                                                            |
| Shijing                           | Jia         |                       |                  |             |                                          |                                                         |                                                                                            |
| Nicholas J                        | Johnson     |                       |                  |             |                                          |                                                         |                                                                                            |
| Sarah                             | Jolley      |                       |                  |             |                                          |                                                         |                                                                                            |
| Alan                              | Jones       |                       |                  |             |                                          |                                                         |                                                                                            |
| Elizabeth Jones B                 | Jones       |                       |                  |             |                                          |                                                         |                                                                                            |
| Alex                              | Kadl        |                       |                  |             |                                          |                                                         |                                                                                            |
| Kirsten N                         | Kangelaris  |                       |                  |             |                                          |                                                         |                                                                                            |
| Markos G                          | Kashiouris  |                       |                  |             |                                          |                                                         |                                                                                            |
| Lawrence E                        | Kass        |                       |                  |             |                                          |                                                         |                                                                                            |
| Marla                             | Keller      |                       |                  |             |                                          |                                                         |                                                                                            |
| Akram                             | Khan        |                       |                  |             |                                          |                                                         |                                                                                            |
| Mehdi                             | Khosravi    |                       |                  |             |                                          |                                                         |                                                                                            |
| Hassan                            | Khouli      |                       |                  |             |                                          |                                                         |                                                                                            |
| Harish                            | Kinni       |                       |                  |             |                                          |                                                         |                                                                                            |
| Michael E                         | Kiyatkin    |                       |                  |             |                                          |                                                         |                                                                                            |

\*First name, last name, and suffix (if applicable) are required and will appear in PubMed.

| *First Name and Middle Initial(s) | *Last Name       | *Suffix (eg, Jr, III) | Academic Degrees | Institution | Location (city, state/province, country) | Role or Contribution, eg, chair, principal investigator | Group (if more than 1 Group listed in the byline) and/or Subgroup (eg, Steering Committee) |
|-----------------------------------|------------------|-----------------------|------------------|-------------|------------------------------------------|---------------------------------------------------------|--------------------------------------------------------------------------------------------|
| Daniel                            | Knox             |                       |                  |             |                                          |                                                         |                                                                                            |
| Amita                             | Krishnan         |                       |                  |             |                                          |                                                         |                                                                                            |
| Nicholas                          | Kurtzman         |                       |                  |             |                                          |                                                         |                                                                                            |
| Matthew R                         | Lammi            |                       |                  |             |                                          |                                                         |                                                                                            |
| Michael J                         | Lanspa           |                       |                  |             |                                          |                                                         |                                                                                            |
| Viet                              | Le               |                       |                  |             |                                          |                                                         |                                                                                            |
| Lindsay M                         | Leither          |                       |                  |             |                                          |                                                         |                                                                                            |
| Joseph                            | Levitt           |                       |                  |             |                                          |                                                         |                                                                                            |
| Michael                           | L'Heureux        |                       |                  |             |                                          |                                                         |                                                                                            |
| George                            | Lim              |                       |                  |             |                                          |                                                         |                                                                                            |
| Alexander                         | Limkakeng        |                       |                  |             |                                          |                                                         |                                                                                            |
| Michael Y                         | Lin              |                       |                  |             |                                          |                                                         |                                                                                            |
| Christopher                       | Lindsell         |                       |                  |             |                                          |                                                         |                                                                                            |
| Kathleen                          | Liu              |                       |                  |             |                                          |                                                         |                                                                                            |
| Kenneth                           | Lyn-Kew          |                       |                  |             |                                          |                                                         |                                                                                            |
| Patrick G                         | Lyons            |                       |                  |             |                                          |                                                         |                                                                                            |
| Fraser C                          | Mackay           |                       |                  |             |                                          |                                                         |                                                                                            |
| Patrick J                         | Maher            |                       |                  |             |                                          |                                                         |                                                                                            |
| Simon A                           | Mahler           |                       |                  |             |                                          |                                                         |                                                                                            |
| Anita                             | Malhotra         |                       |                  |             |                                          |                                                         |                                                                                            |
| Brian E                           | Malley           |                       |                  |             |                                          |                                                         |                                                                                            |
| Michael A                         | Matthay          |                       |                  |             |                                          |                                                         |                                                                                            |
| Teresa                            | May              |                       |                  |             |                                          |                                                         |                                                                                            |
| Katherine                         | Mayer            |                       |                  |             |                                          |                                                         |                                                                                            |
| Kirby P                           | Mayer            |                       |                  |             |                                          |                                                         |                                                                                            |
| Jakob I                           | McSparron        |                       |                  |             |                                          |                                                         |                                                                                            |
| Bryan J                           | McVerry          |                       |                  |             |                                          |                                                         |                                                                                            |
| Chadwick D                        | Miller           |                       |                  |             |                                          |                                                         |                                                                                            |
| Stephen                           | Miller           |                       |                  |             |                                          |                                                         |                                                                                            |
| Steven C                          | Minear           |                       |                  |             |                                          |                                                         |                                                                                            |
| Eduardo                           | Mireles          |                       |                  |             |                                          |                                                         |                                                                                            |
| Jason                             | Mock             |                       |                  |             |                                          |                                                         |                                                                                            |
| Amira                             | Mohamed          |                       |                  |             |                                          |                                                         |                                                                                            |
| Ashley A                          | Montgomery-Yates |                       |                  |             |                                          |                                                         |                                                                                            |
| Peter                             | Morris           |                       |                  |             |                                          |                                                         |                                                                                            |
| Jarrold M                         | Mosier           |                       |                  |             |                                          |                                                         |                                                                                            |
| Ari                               | Moskowitz        |                       |                  |             |                                          |                                                         |                                                                                            |
| Marc                              | Moss             |                       |                  |             |                                          |                                                         |                                                                                            |
| Simon R                           | Mucha            |                       |                  |             |                                          |                                                         |                                                                                            |
| Elizabeth                         | Munroe           |                       |                  |             |                                          |                                                         |                                                                                            |
| Rahul                             | Nair             |                       |                  |             |                                          |                                                         |                                                                                            |
| Utsav                             | Nandi            |                       |                  |             |                                          |                                                         |                                                                                            |
| Denise                            | Nassisi          |                       |                  |             |                                          |                                                         |                                                                                            |

\*First name, last name, and suffix (if applicable) are required and will appear in PubMed.

| *First Name and Middle Initial(s) | *Last Name       | *Suffix (eg, Jr, III) | Academic Degrees | Institution | Location (city, state/province, country) | Role or Contribution, eg, chair, principal investigator | Group (if more than 1 Group listed in the byline) and/or Subgroup (eg, Steering Committee) |
|-----------------------------------|------------------|-----------------------|------------------|-------------|------------------------------------------|---------------------------------------------------------|--------------------------------------------------------------------------------------------|
| William                           | Nkemdirim        |                       |                  |             |                                          |                                                         |                                                                                            |
| Dustin L                          | Norton           |                       |                  |             |                                          |                                                         |                                                                                            |
| Brian                             | O'Gara           |                       |                  |             |                                          |                                                         |                                                                                            |
| Daniel J                          | O'Hearn          |                       |                  |             |                                          |                                                         |                                                                                            |
| Darragh Shane                     | OMahony          |                       |                  |             |                                          |                                                         |                                                                                            |
| David B                           | Page             |                       |                  |             |                                          |                                                         |                                                                                            |
| Robert                            | Paine            |                       |                  |             |                                          |                                                         |                                                                                            |
| Pauline K                         | Park             |                       |                  |             |                                          |                                                         |                                                                                            |
| Sara                              | Pasha            |                       |                  |             |                                          |                                                         |                                                                                            |
| Gabriel D                         | Patarroyo Aponte |                       |                  |             |                                          |                                                         |                                                                                            |
| Avignat                           | Patel            |                       |                  |             |                                          |                                                         |                                                                                            |
| Bela                              | Patel            |                       |                  |             |                                          |                                                         |                                                                                            |
| Ithan D                           | Peltan           |                       |                  |             |                                          |                                                         |                                                                                            |
| Sarah                             | Perman           |                       |                  |             |                                          |                                                         |                                                                                            |
| Jacqueline Marie                  | Pflaum-Carlson   |                       |                  |             |                                          |                                                         |                                                                                            |
| Simone                            | Phang-Lyn        |                       |                  |             |                                          |                                                         |                                                                                            |
| Victor                            | Pinto-Plata      |                       |                  |             |                                          |                                                         |                                                                                            |
| Matthew E                         | Prekker          |                       |                  |             |                                          |                                                         |                                                                                            |
| Mike                              | Puskarich        |                       |                  |             |                                          |                                                         |                                                                                            |
| Nida                              | Qadir            |                       |                  |             |                                          |                                                         |                                                                                            |
| Raju M                            | Reddy            |                       |                  |             |                                          |                                                         |                                                                                            |
| Todd W                            | Rice             |                       |                  |             |                                          |                                                         |                                                                                            |
| Lynne D                           | Richardson       |                       |                  |             |                                          |                                                         |                                                                                            |
| Richard R                         | Riker            |                       |                  |             |                                          |                                                         |                                                                                            |
| Emanuel P                         | Rivers           |                       |                  |             |                                          |                                                         |                                                                                            |
| Bryce RH                          | Robinson         |                       |                  |             |                                          |                                                         |                                                                                            |
| Angela J                          | Rogers           |                       |                  |             |                                          |                                                         |                                                                                            |
| Derek W                           | Russell          |                       |                  |             |                                          |                                                         |                                                                                            |
| Debasis                           | Sahoo            |                       |                  |             |                                          |                                                         |                                                                                            |
| Christian                         | Sandrock         |                       |                  |             |                                          |                                                         |                                                                                            |
| Shane                             | Sanne            |                       |                  |             |                                          |                                                         |                                                                                            |
| Rachel G                          | Scheraga         |                       |                  |             |                                          |                                                         |                                                                                            |
| Eric                              | Schmidt          |                       |                  |             |                                          |                                                         |                                                                                            |
| Jordan B                          | Schooler         |                       |                  |             |                                          |                                                         |                                                                                            |
| Kristin                           | Schwab           |                       |                  |             |                                          |                                                         |                                                                                            |
| Wesley H                          | Self             |                       |                  |             |                                          |                                                         |                                                                                            |
| Matthew W                         | Semler           |                       |                  |             |                                          |                                                         |                                                                                            |
| Paulina                           | Sergot           |                       |                  |             |                                          |                                                         |                                                                                            |
| Faraaz                            | Shah             |                       |                  |             |                                          |                                                         |                                                                                            |
| Nate                              | Shapiro          |                       |                  |             |                                          |                                                         |                                                                                            |
| Daniel L                          | Shaw             |                       |                  |             |                                          |                                                         |                                                                                            |
| Robert                            | Sherwin          |                       |                  |             |                                          |                                                         |                                                                                            |
| Matthew                           | Siuba            |                       |                  |             |                                          |                                                         |                                                                                            |

\*First name, last name, and suffix (if applicable) are required and will appear in PubMed.

| *First Name and Middle Initial(s) | *Last Name      | *Suffix (eg, Jr, III) | Academic Degrees | Institution | Location (city, state/province, country) | Role or Contribution, eg, chair, principal investigator | Group (if more than 1 Group listed in the byline) and/or Subgroup (eg, Steering Committee) |
|-----------------------------------|-----------------|-----------------------|------------------|-------------|------------------------------------------|---------------------------------------------------------|--------------------------------------------------------------------------------------------|
| Michael                           | Sjoding         |                       |                  |             |                                          |                                                         |                                                                                            |
| Howard                            | Smithline       |                       |                  |             |                                          |                                                         |                                                                                            |
| Mark R                            | Sochor          |                       |                  |             |                                          |                                                         |                                                                                            |
| John R                            | Spurzem         |                       |                  |             |                                          |                                                         |                                                                                            |
| Vasisht                           | Srinivasan      |                       |                  |             |                                          |                                                         |                                                                                            |
| Tessa L                           | Steel           |                       |                  |             |                                          |                                                         |                                                                                            |
| Jay S                             | Steingrub       |                       |                  |             |                                          |                                                         |                                                                                            |
| Bryan                             | Stenson         |                       |                  |             |                                          |                                                         |                                                                                            |
| Sarah A                           | Sterling        |                       |                  |             |                                          |                                                         |                                                                                            |
| Jason                             | Stopyra         |                       |                  |             |                                          |                                                         |                                                                                            |
| William-May B                     | Stubblefield    |                       |                  |             |                                          |                                                         |                                                                                            |
| Jeffrey M                         | Sturek          |                       |                  |             |                                          |                                                         |                                                                                            |
| Jamie L                           | Sturgill        |                       |                  |             |                                          |                                                         |                                                                                            |
| Jennifer                          | Swiderek        |                       |                  |             |                                          |                                                         |                                                                                            |
| Aamer                             | Syed            |                       |                  |             |                                          |                                                         |                                                                                            |
| Daniel                            | Talmor          |                       |                  |             |                                          |                                                         |                                                                                            |
| Geneva                            | Tatem           |                       |                  |             |                                          |                                                         |                                                                                            |
| Nirosshan                         | Thiruchelvam    |                       |                  |             |                                          |                                                         |                                                                                            |
| Taylor                            | Thompson        |                       |                  |             |                                          |                                                         |                                                                                            |
| Melissa L                         | Thompson Bastin |                       |                  |             |                                          |                                                         |                                                                                            |
| Mark                              | Tidswell        |                       |                  |             |                                          |                                                         |                                                                                            |
| Sam S                             | Torbati         |                       |                  |             |                                          |                                                         |                                                                                            |
| Stacy A                           | Trent           |                       |                  |             |                                          |                                                         |                                                                                            |
| Terren                            | Trott           |                       |                  |             |                                          |                                                         |                                                                                            |
| Thomas E                          | Van der Kloot   |                       |                  |             |                                          |                                                         |                                                                                            |
| Kelly C                           | Vranas          |                       |                  |             |                                          |                                                         |                                                                                            |
| Bonnie                            | Wang            |                       |                  |             |                                          |                                                         |                                                                                            |
| Ralph                             | Wang            |                       |                  |             |                                          |                                                         |                                                                                            |
| Lorraine                          | Ware            |                       |                  |             |                                          |                                                         |                                                                                            |
| Christopher M                     | Waters          |                       |                  |             |                                          |                                                         |                                                                                            |
| Alexandra J                       | Weissman        |                       |                  |             |                                          |                                                         |                                                                                            |
| Katherine D                       | Wick            |                       |                  |             |                                          |                                                         |                                                                                            |
| Aimee M                           | Wilkin          |                       |                  |             |                                          |                                                         |                                                                                            |
| David M                           | Wilson          |                       |                  |             |                                          |                                                         |                                                                                            |
| Jenny G                           | Wilson          |                       |                  |             |                                          |                                                         |                                                                                            |
| David L                           | Wyles           |                       |                  |             |                                          |                                                         |                                                                                            |
| Joseph H                          | Yanta           |                       |                  |             |                                          |                                                         |                                                                                            |
| Donald M                          | Yealy           |                       |                  |             |                                          |                                                         |                                                                                            |
| Scott                             | Youngquist      |                       |                  |             |                                          |                                                         |                                                                                            |
| Tanzira                           | Zaman           |                       |                  |             |                                          |                                                         |                                                                                            |
